# Supplementary material for: Large-Size Subunit Catalases Are Chimeric Proteins: A H2O2 Selecting Domain with Catalase Activity Fused to a Hsp31-Derived Domain Conferring Protein Stability and Chaperone Activity
Source: MDPI journal article supplement (doi:10.3390/antiox11050979), 2022-05-17
Supplement: s1 [file s1]

Table S2. Frequency (%) of amino acid in the catalytic and the chaperone domain of LSCs

| AA                 | H <sub>r</sub> <sup>a</sup> | DP <sup>b</sup> | PDB <sup>c</sup> ±20%        | CATw <sup>d</sup>         | CAT <sub>HC</sub> <sup>e</sup> | L1 <sub>C-T</sub> <sup>f</sup> | L2 <sub>C-T</sub> <sup>f</sup> | Bac <sub>C-T</sub> <sup>g</sup> |
|--------------------|-----------------------------|-----------------|------------------------------|---------------------------|--------------------------------|--------------------------------|--------------------------------|---------------------------------|
| I                  | 0.00                        | - 0.33          | 5.91 (4.7-7.1) - 1.95        | <b>4.17</b> - 1.39        | 4.34 - 1.45                    | 6.25 - 2.08                    | <b>2.80</b> - <b>0.93</b>      | <b>4.38</b> - <b>1.46</b>       |
| V                  | 0.46                        | - 0.29          | 6.86 (5.5-8.2) - 1.99        | 6.50 - 1.89               | 6.21 - 1.80                    | <b>8.90</b> - 2.58             | <b>11.15</b> - 3.23            | <b>8.98</b> - <b>2.60</b>       |
| A                  | 0.47                        | - 0.04          | 8.25 (6.6-9.9) - 0.33        | 7.91 - 0.32               | 6.64 - 0.27                    | <b>13.55</b> - 0.54            | <b>13.35</b> - 0.53            | <b>17.70</b> - <b>0.71</b>      |
| L                  | 0.79                        | - 0.20          | 9.65 (7.7-11.6) - 1.93       | <b>6.76</b> - 1.35        | <b>6.75</b> - 1.35             | <b>6.15</b> - 1.23             | 8.70 - 1.74                    | 9.57 - 1.91                     |
| G                  | 0.80                        | - 0.12          | 7.07 (5.7-8.5) - 0.85        | 7.61 - 0.91               | 7.42 - 0.89                    | <b>9.15</b> - 1.10             | <b>11.45</b> - <b>1.37</b>     | <b>11.26</b> - <b>1.35</b>      |
| M                  | 0.38                        | - 0.05          | 2.41 (1.9-2.9) - 0.12        | <b>1.87</b> - <b>0.09</b> | <b>1.89</b> - <b>0.09</b>      | <b>1.55</b> - <b>0.08</b>      | <b>0.45</b> - <b>0.02</b>      | <b>1.40</b> - <b>0.07</b>       |
| C                  | 0.59                        | - 0.31          | <u>1.38 (1.1-1.7) - 0.43</u> | <b>0.46</b> - 0.14        | <b>0.50</b> - 0.16             | <b>0.30</b> - <b>0.09</b>      | <b>0.00</b> - <b>0</b>         | <u>1.05 - 0.32</u>              |
|                    |                             |                 | 41.53 (33-50) - 7.60         | 35.28 - 6.09              | 33.75 - 6.01                   | 45.90 - 7.70                   | 47.90 - 7.82                   | 53.62 - 8.42                    |
|                    |                             |                 |                              | - 15.05%                  | -18.73%                        | +10.5%                         | +15.3%                         | + <b>29.11%</b>                 |
| T                  | 0.66                        | 0.00            | 5.35 (4.3-6.4)               | 5.56                      | 6.18                           | 5.35                           | 6.10                           | 3.61                            |
| S                  | 1.46                        | +0.33           | 6.64 (5.3-8.0) +2.21         | 5.29 +1.76                | 5.12 +1.71                     | 7.10 +2.37                     | 7.60 +2.53                     | 4.56 +1.52                      |
| N                  | 2.03                        | - 0.20          | 4.06 (3.2-4.9) +0.81         | <b>5.23</b> +1.05         | 4.89 +0.98                     | <b>2.40</b> + <b>0.48</b>      | <b>2.25</b> + <b>0.45</b>      | <b>1.22</b> + <b>0.24</b>       |
| Q                  | 1.26                        | +0.46           | 3.93 (3.1-4.7) +1.81         | 4.40 +2.02                | 4.31 +1.98                     | <b>2.70</b> + <b>1.24</b>      | <b>3.15</b> + <b>1.45</b>      | <b>1.78</b> + <b>0.82</b>       |
| R                  | 1.60                        | +0.09           | 5.53 (4.4-6.6) +0.50         | 5.99 +0.54                | 5.73 +0.52                     | 5.25 +0.46                     | <b>3.55</b> + <b>0.32</b>      | 5.16 +0.46                      |
| K                  | 2.76                        | +0.40           | 5.80 (4.6-7.0) +2.32         | 4.93 +1.97                | 4.87 +1.95                     | 5.30 +2.12                     | 5.30 +2.12                     | <b>3.83</b> + <b>1.53</b>       |
| D                  | 3.20                        | - 0.03          | 5.46 (4.4-6.6) +0.16         | <b>6.81</b> +0.20         | <b>6.98</b> +0.21              | <b>4.65</b> +0.14              | <b>7.30</b> + <b>0.22</b>      | <b>7.49</b> + <b>0.22</b>       |
| E                  | 3.32                        | +0.66           | <u>6.72 (5.4-8.1) +4.42</u>  | 5.61 +3.70                | 5.61 +3.70                     | 6.10 +4.03                     | <b>5.30</b> + <b>3.50</b>      | <b>4.82</b> + <b>3.18</b>       |
|                    |                             |                 | 43.49 (34-52) +12.23         | 43.82 +11.24              | 43.69 +11.05                   | 38.65 +10.84                   | 40.55 +10.59                   | 32.47 +7.97                     |
|                    |                             |                 |                              |                           |                                | -11.13%                        |                                | - <b>25.34%</b>                 |
| H                  | 2.29                        | - 0.10          | 2.27 (1.8-2.7) - 0.23        | <b>3.55</b> - <b>0.36</b> | <b>3.94</b> - 0.39             | <b>3.25</b> - 0.33             | <b>0.15</b> - <b>0.02</b>      | 2.63 - 0.26                     |
| P                  | 0.55                        | +0.57           | 4.73 (3.8-5.7) +2.70         | <b>6.41</b> + <b>3.65</b> | <b>6.68</b> +3.81              | <b>3.65</b> +2.08              | <b>3.20</b> + <b>1.82</b>      | 4.69 +2.67                      |
| F                  | 0.24                        | - 0.33          | 3.86 (3.1-4.6) - 1.29        | <b>5.97</b> - <b>1.99</b> | <b>7.10</b> - 2.37             | <b>4.70</b> - 1.57             | <b>5.20</b> - <b>1.71</b>      | 3.36 - 1.56                     |
| W                  | 0.65                        | - 0.60          | 1.10 (0.9-1.3) - 0.66        | <b>1.44</b> - <b>0.86</b> | <b>2.00</b> - 1.20             | 1.00 - 0.60                    | <b>0.50</b> - <b>0.30</b>      | 1.00 - 0.60                     |
| Y                  | 0.83                        | - 0.44          | <u>2.92 (2.3-3.5) - 1.28</u> | 3.36 - 1.48               | 3.12 - 1.37                    | 2.90 - 1.28                    | 2.45 - 1.08                    | <b>1.37</b> - <b>0.60</b>       |
|                    |                             |                 | 14.88 (12-18) - 0.76         | 20.73 - 1.04              | 22.84 - 1.52                   | 15.50 - 1.70                   | 11.50 - 1.29                   | 13.06 - 0.35                    |
|                    |                             |                 |                              | + <b>39.3%</b>            | + <b>53.5%</b>                 |                                | - <b>22.72%</b>                | -12.25%                         |
| Instability factor |                             |                 | +3.87                        | +4.11                     | + 3.52                         | +1.44                          | +1.48                          | - 0.8                           |

**Table S2.** Frequency (%) of amino acids in the catalytic and the chaperone domain of LSCs. Frequency of amino acid residues that are 20% higher or more than of the PDB mean are shown in black bold letters; frequency that are 20% lower or more are shown in gray bold letters. AA, the 20 amino acids, ordered as hydrophobic, hydrophilic, or heterocyclic/aromatic. <sup>a</sup>Hydrophobicity scale for amino acid residues determined at the protein surface; scale is derived from the principal component region but has some overlap with other regions; amino acid hydrophobicity of some residues varies according to the hydrophobic or hydrophilic surrounding [1]. <sup>b</sup> Disorder propensity (DP) taken from [2, figure 6]. <sup>c</sup> SwissProt Database statistics mean frequency of amino acids; in parenthesis are values that are  $\pm 20\%$  of the mean. <sup>d</sup> Mean amino acid frequency of 38 different catalases cut at the first conserved residue of the N-terminal end and, in the case of the 7 LSCs of the same list, the C-terminal domain was eliminated. <sup>e</sup> Mean frequency values of 38 different catalases ([Table S1](#)) cut at the first conserved residue at the N-terminal end and at the middle of the wrapping loop, which is the sequence that defines the heme pocket. <sup>f</sup> Mean frequency value of the first 19 orthologues each in a Blast search with CAT-1 and CAT3. <sup>g</sup> C-terminal domain mean value of the 19 orthologous of *Cereibacter sphaeroides katE* and other the different groups of bacterial LSCs ([Table S1](#)).

1) Di Rienzo L, Miotto M, Bò L, Ruocco G, Raimondo D and Milanetti E (2021) Characterizing Hydropathy of Amino Acid Side Chain in a Protein Environment by Investigating the Structural Changes of Water Molecules Network. Front. Mol. Biosci. 8:626837. doi:10.3389/fmolb.2021.626837

2) Shimizu, K.; Muraoka, Y.; Hirose, S.; Tomii, K.; Noguchi, T. Predicting mostly disordered proteins by using structure-unknown protein data. BMC Bioinformatics 2007, 8, doi:10.1186/1471-2105-8-78.

CAT-1 treated with  
Subtilisin loses its  
CT but remains active

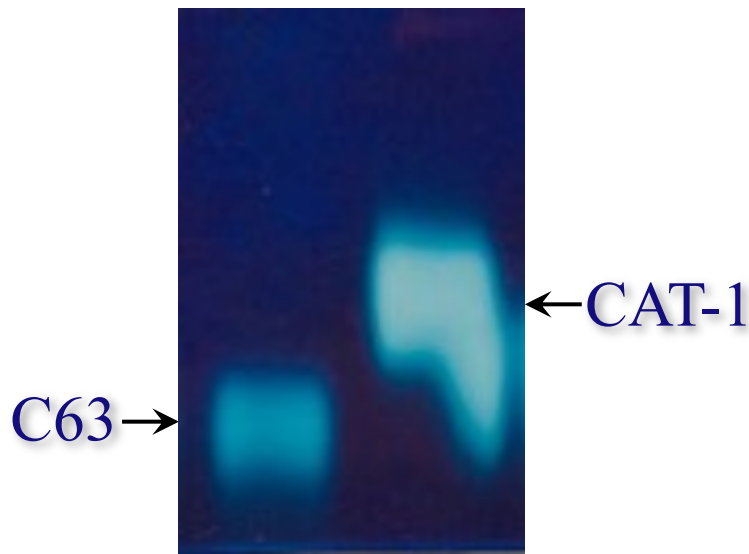

PAGE: non-denaturing conditions,  
stained for catalase activity

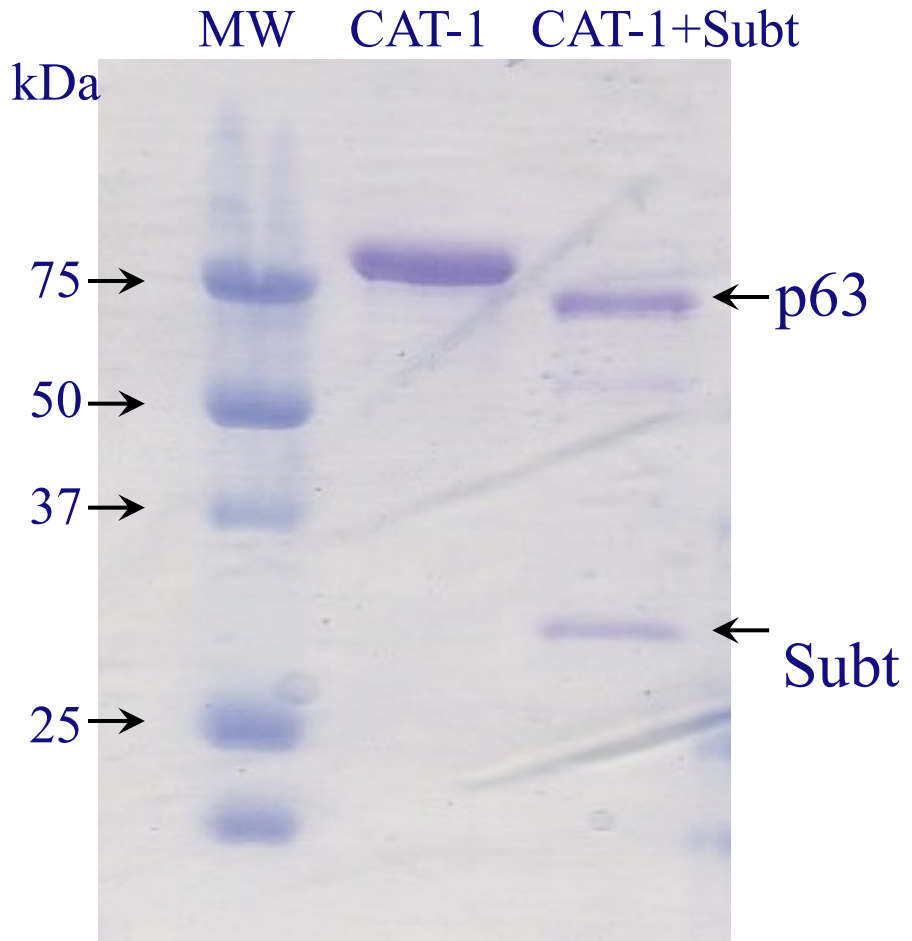

PAGE: denaturing conditions,  
stained for proteins

C63 = CAT-1 without its CT domain;    p63 = 63 kDa peptides  
Subt = Subtilisin

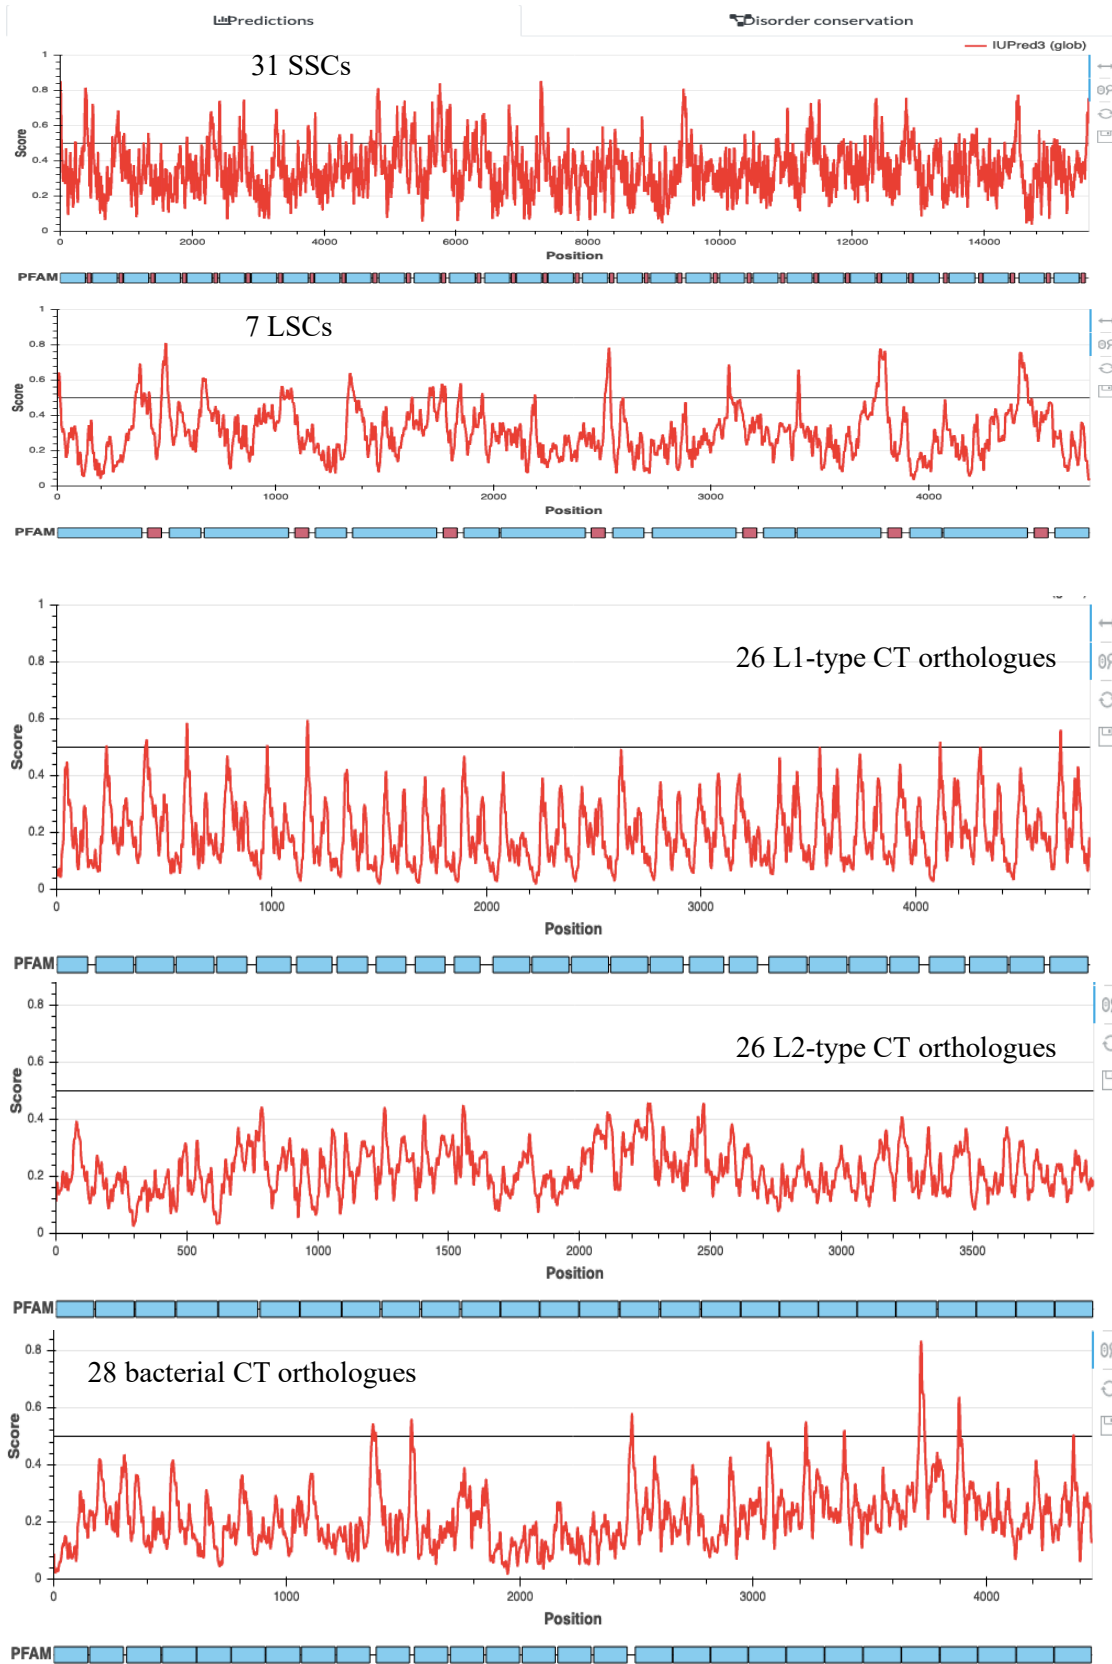

**Figure S2.** Stability prediction of SSCs (31), LSCs (7) and CT domains of fungal L1-type (26), L2-type (26) and bacterial (28). LSCs are more stable than SSCs and CT domains are very stable.

|                   |                                                                        |
|-------------------|------------------------------------------------------------------------|
| YHBO_ECOLI        | -----MSKKIAVLITD                                                       |
| Hsp31_Neu_cra     | -----MSAPKVLVVLT                                                       |
| ProtI_Amy_met     | -----MANTLSGKRVAFVVP                                                   |
| L2_Pen_bra_MC_CT  | -----EVPEPDPTFYHDNT-----TANIGAFGQKLL--KLDGL-----KV-GVLAS38             |
| L1_Aur_mel_MC_CT  | -----DIPEEARV---NTG-----KRSKN-LSQE--DFPPKNLTIA-----TRMVAILLIAD41       |
| HCHA_ECOLI        | MTVQTSKNPQVDIAEDNAFFPSEY-----S-LSQY--TSPVSDLDGVDYPKPY-RG-KHKIL-VIAAD57 |
| Bac_MC_CT_Kib_phy | -----PAPAG-EPANDVTTSPA-LSQVV-TEPG--PIA-----GRKI-GVIAD37                |
| MC_CT_Str_alb     | -----PAPAAGEPLADPSPSPA-LSQVGQTWPPD-----GRIV-GIVAD37                    |
| YajL_ECOLI        | -----MSASALVCLAP                                                       |
| DJ1_Tul_sp        | -----MPSALILVAN                                                        |
| Intr_Prot_Des_sp  | -----MKALILSAD                                                         |

**Figure S3 A.** The mobile coil of LSCs has similarity with the N-terminal sequence of bacterial Hsp31 (HchA). Alignment of one representative protein sequence of YhbO, fungal Hsp31, Protease I, YajL, fungal DJ-1 and Intracellular protease together with the MC\_CT of bacterial and fungal (L1, L2) LSCs. The mobile coil of the four groups of LSCs has sequence similarity with the N-terminal domain of bacterial Hsp31 (HchA). The other DJ-1/PfpI proteins and the fungal Hsp31 do not show sequence similarity with this region.

|                    |                                                                                        |
|--------------------|----------------------------------------------------------------------------------------|
| L2_Pen_bra_MC_CT   | 76NQTYSA-TDAINFDAVIVADGAEGLFGSNSFTASPT-AKASGATSL-YPAGRPLEILVDAFRFGKPVGTGLGQGV LALDD149 |
| Bac_MC_CT_Kib_phy  | 73ERTLLT-ARSIEFDAVVVAGGTA-----PTNDIKLVLLLQEAFRHCKAIAAWGTGQDILED134                     |
| MC_CT_Str_alb      | 79QRTFAT-ARSVFEDAVMLAGVPARG--ADALGSRD--AKAGDAQAAATDPRLLLLLVSEAYRHGKAIGAWNSGEQVLT152    |
| L1_Aur_mel_MC_CT   | 96DHNLEG-QRSTMYDAIFIPGGADSI-----ATLRKNGRALHYVREAFGHLKSI GATGEAVAFVKD146                |
| Hsp31_Neu_cra      | 90E-FVGNPSAIAPYSAIFFPGGH-GPM-----YDLATSSSESQQLIREFWDAGKTVAAVCHGPAALVN149               |
| HCHA_ECOLI         | 135D-VVASLNADS EYAAIFVPGGH-GAL-----IGLPESQDVAAALQWAIKNDRFVISLCHGPAAF193                |
| DJ1_Tul_sp         | 60DIDLRLLEKPREYDALIIPGGAQGA-----ETLSGSSVVQQLVQDYKSGKLVGMICAGSLVALR120                  |
| YajL_ECOLI         | 55DAPLVEVA-DGEYDVIVLPGGIKGA-----ECFRDSTLLVETVKQFHRSGRIVAAICAAPATV114                   |
| Intrac_Prot_Des_sp | 50DKTIDEV-NPDDYAILILPGGK-AP-----VEVRKDPKALEIARSFFAGSKPVTACHGPQILIS108                  |
| ProtI_Amy_met      | 62DKVVTDV-SPDDFDALVLPGGVANP-----DFLRTVPDAVRFVRFSSQKPVAAICHAPWTLIE121                   |
| YHBO_ECOLI         | 54DKSIDEV-TPAEFDALLPGGH-SP-----DYLRGDNRFVTFTRDFVNSGKPVFAICHGQQLIS112                   |
|                    | : : : :                                                                                |
| AraC_Pec_car       | 8ESQPNP LLLPGYSFNAYLVAGL28                                                             |
|                    | 69FFCNP674                                                                             |
|                    | 292AAKTLPGTWGERILNVIS309                                                               |
|                    | 215RLAHLFREQV224                                                                       |

**Figure S3 B.** Proteins of the DJ-1/PfpI superfamily and the CT of LSCs show sequence similarity in two contiguous hydrophobic amino acid sequences flanked by charged amino acid residues. Alignment of one representative protein sequence of the DJ-1/PfpI superfamily: YhbO, fungal Hsp31, Protease I, YajL, fungal DJ-1 and Intracellular protease and the MC\_CT of representative sequences of four groups of LSCs. AraC shows sequence similarity with this region with non-contiguous stretches of hydrophobic residues and charged amino acid residues.

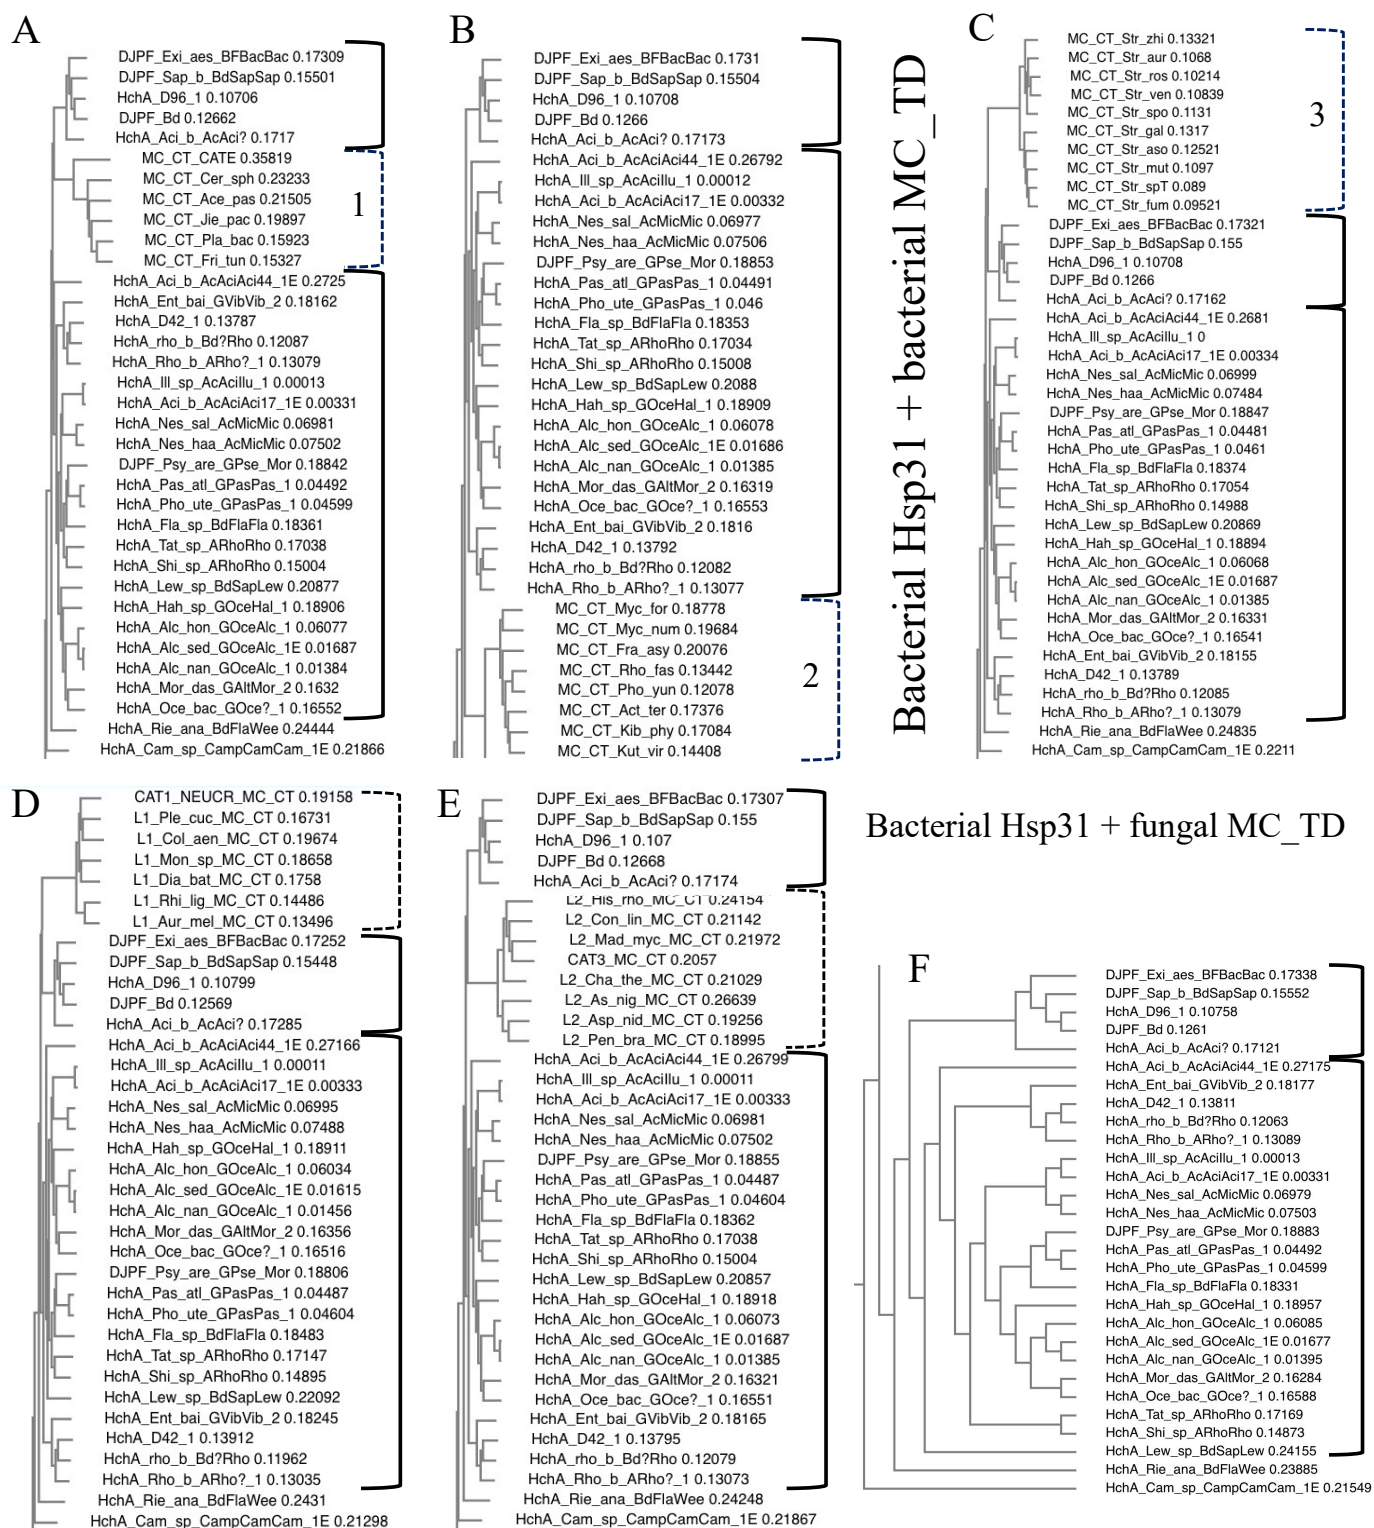

**Figure S4.** Phylogeny of bacterial Hsp31 and the MC\_TD of representative bacterial and fungal LSCs. HchA sequences (186) from different phyla and families of bacteria were aligned together with the MC\_TD of three groups of bacterial and two of fungal LSCs. (A) With MC\_TD of bacterial group-1; (B) With MC\_TD of bacterial group-2; (C) With MC\_TD of bacterial group-3 (Streptomyces); (D) With MC\_TD of fungal L1-group; E) With MC\_TD of fungal L2-group; (F) Cladogram of the two groups of Hsp31 sequences that are closest to all MC\_TD. A group of 5 sequences of Hsp31 align preferentially with group-1 and group-3 of bacterial and both groups of fungal MC\_TD and includes: one Bacillota (Firmicutes) (*Exiguobacterium aestuarii*), one Actinomycetota (*Acidimicrobiia*) two Bacteroidota and one Pseudomonadota delta. Other 22 sequences are also consistently related to all MC\_CTs.
